# Supplementary material for: Genetic association in female stress urinary incontinence based on proteomic findings: a case-control study
Source: Int Urogynecol J. 2019 Feb 4;31(1):117–22. doi: 10.1007/s00192-019-03878-0 (PMC6949200; doi:10.1007/s00192-019-03878-0)
Supplement: Supplementary file 1 — List of primer (XLSX 14 kb) [file 192_2019_3878_MOESM1_ESM.xlsx]

## Sheet: Tabelle1
No	Oligo Name	Sequence (written 5' - 3')			Length	Product	SNPs
1	SERPINA5_In2-3_1_L	TGACCTCTCTGACCCTCTGT			20	318bp	3 SNPs
2	SERPINA5_In2-3_1_R	AAGCTCTCTATTTTACAGAGTTTTCCAA			28
3	SERPINA5_In2-3_2_L	CACAGGAACGGCTCTTGG			18	250bp	4 SNPs
4	SERPINA5_In2-3_2_R	TCTCAGACTTCCAGCTTCCAG			21
5	SERPINA5_Ex3_3_L	CTTCCTCCTCTTGTGCCTGG			20	334bp	4 SNPs
6	SERPINA5_Ex3_3_R	AAGGAGCTGCTGAAAGCCTC			20
7	SERPINA5_ In5-6_4_L	TCCCAAATTCTCCATTGAGGGC			22	215bp	1 SNP
8	SERPINA5_ In5-6_4_R	TGGAATGAAATGGGGTAGAGTAGA			24
9	UMOD_In5-6_1_L	GTTTTCAAGAGAGGAAGCACGG			22	300bp	2 SNPs
10	UMOD_In5-6_1_R	GTGCAGCCTGAACAACGAG			19
12	UMOD_5UTR_2_L	ACCTCAGTGATTGCACAACAGC			22	365bp	2 SNPs
13	UMOD_5UTR_2_R	AGAATGGCTGAAAGTCAGAACC			22
14	UMOD_5UTR_3_L	TTTGGCAAAGATGAAAGCAA			20	158bp	2 SNPs
15	UMOD_5UTR_3_R	GGAGTGGAAATTCTGGGTCA			20
16	UMOD_Ex3_4_L	CGGGGTTGGACTGCGTG			17	393bp	2 SNPs
17	UMOD_Ex3_4_R	TGCAGTACGCCAGGTGAC			18
18	UMOD_In5-6_5_L	TGACAGAGACAACCGGGACT			20	373bp	1 SNPs
19	UMOD_In5-6_5_R	ACTTTTCCCATCTGTAAAATGGAGA			25
20	COL1a1_In1-2_L	CTTTGGGGGACTGGGGATG			19	209bp	1 SNPs
21	COL1a1_In1-2_R	GAGGAGAGAAGGGAGGTCCA			20
22	MMP1_5UTR_L	TGGAGTCACTTCAGTGGCAAG			21	317bp	1 SNP
23	MMP1_5UTR_R	TGTCTCCCACCTTTCCCACT			20
